# Supplementary material for: A computational workflow for the expansion of heterologous biosynthetic pathways to natural product derivatives
Source: PubMed Central journal article supplement (PMC7979880; doi:10.1038/s41467-021-22022-5), 2021-03-19
Supplement: 41467_2021_22022_MOESM1_ESM.pdf [file 41467_2021_22022_MOESM1_ESM.pdf]

**A computational workflow for the expansion of heterologous biosynthetic pathways to natural product derivatives**

Hafner and Payne *et al.*

**Supplementary Table 1. Overview on network statistics.**

|                                                                     | Reactions | Compounds |
|---------------------------------------------------------------------|-----------|-----------|
| Total entries in raw BNICE.ch network                               | 17,597    | 4,838     |
| Biological / bioactive entries in raw BNICE.ch network              | 244       | 720       |
| Total entries in benzyloquinoline alkaloid network                  | 7,527     | 1,518     |
| Biological / bioactive entries in benzyloquinoline alkaloid network | 49        | 99        |
| Potential targets                                                   |           | 1,501     |
| Potential targets with annotation (min 1 citation/patent)           |           | 545       |

**Supplementary Table 2. Presence of known biosynthetic BIA pathways in the generated reaction network.**

| Compound name               | Source database | In network | Precursor <sup>a</sup>                               | Shortest pathway <sup>b</sup> | Shortest pathway in source <sup>c</sup> | Pathways visualized online | Comment                                                                                                                                 |
|-----------------------------|-----------------|------------|------------------------------------------------------|-------------------------------|-----------------------------------------|----------------------------|-----------------------------------------------------------------------------------------------------------------------------------------|
| Allocryptopine              | KEGG            | yes        | ( <i>S</i> )-cis- <i>N</i> -methylcanadine           | 1                             | 1                                       | yes                        |                                                                                                                                         |
| Berberine                   | MetaCyc         | yes        | ( <i>S</i> )-canadine                                | 1                             | 1                                       | yes                        |                                                                                                                                         |
| Dehydroscoulerine           | MetaCyc         | yes        | ( <i>S</i> )-scoulerine                              | 1                             | 1                                       | no                         |                                                                                                                                         |
| ( <i>S</i> )-nororientaline | KEGG            | yes        | 3'-Hydroxy- <i>N</i> -methyl-( <i>S</i> )-coclaurine | 2                             | 2                                       | no                         |                                                                                                                                         |
| Corydaline                  | KEGG            | yes        | Tetrahydro-columbamine                               | 2                             | 3                                       | yes                        | Shortcut found via tetrahydropalmatine or isocorybulbine.                                                                               |
| Magnoflorine                | KEGG, MetaCyc   | yes        | ( <i>S</i> )-reticuline                              | 2                             | 2                                       | yes                        |                                                                                                                                         |
| Palmatine                   | MetaCyc         | yes        | Tetrahydro-columbamine                               | 2                             | 2                                       | yes                        |                                                                                                                                         |
| Salutaridinol               | KEGG            | yes        | ( <i>S</i> )-reticuline                              | 2                             | 4                                       | yes                        | 2 steps from ( <i>R</i> )-reticuline, or 4 steps from ( <i>S</i> )-reticuline.                                                          |
| Coptisine                   | MetaCyc         | yes        | ( <i>S</i> )-scoulerine                              | 3                             | 3                                       | yes                        |                                                                                                                                         |
| Epiberberine                | MetaCyc         | yes        | ( <i>S</i> )-scoulerine                              | 3                             | 3                                       | yes                        |                                                                                                                                         |
| Protopine                   | KEGG            | yes        | ( <i>S</i> )-cis- <i>N</i> -methylcanadine           | 3                             | 4                                       | yes                        | Shortcuts found via allocryptopine, hunnemanine, and others.                                                                            |
| Papaverine                  | KEGG, MetaCyc   | yes        | ( <i>S</i> )-reticuline                              | 4                             | 4                                       | yes                        |                                                                                                                                         |
| Chelerythrine               | MetaCyc         | no         | ( <i>S</i> )-cis- <i>N</i> -methylcanadine           | N/A                           | 4                                       |                            | Chelerythrine is 4 reaction steps away from the precursor. Step 1 and 2 are in the network, but step 3 (a spontaneous reaction) is not. |

<sup>a</sup>Closest noscapine pathway intermediate; <sup>b</sup>Length of shortest pathway from precursor to compound; <sup>c</sup>Distance from precursor in source database

**Supplementary Table 3. Additional information for 15 candidate targets one reaction step away from the initial noscapine pathway.**

| Rank | Name                  | Iteration | Identifier | Number of pathways | Precursor                                  | Best BridgIT score | Predicted enzyme |
|------|-----------------------|-----------|------------|--------------------|--------------------------------------------|--------------------|------------------|
| 3    | Berberine             | 1         | 79         | 2                  | ( <i>S</i> )-canadine                      | 1.00               | 1.3.3.8          |
| 6    | Tetrahydropalmatine   | 1         | 171        | 2                  | Tetrahydrocolumbamine                      | 1.00               | 2.1.1.89         |
| 13   | Columbamine           | 1         | 83         | 1                  | Tetrahydrocolumbamine                      | 0.99               | 1.3.3.8          |
| 15   | Salutaridine          | 1         | 155        | 1                  | ( <i>S</i> )-reticuline                    | 1.00               | 1.14.19.67       |
| 16   | Norlaudanosoline      | 1         | 113        | 3                  | ( <i>S</i> )-norcoclaurine                 | 0.99               | 1.14.14.102      |
| 17   | Stepholidine          | 1         | 150        | 1                  | Tetrahydrocolumbamine                      | 0.78               | 1.14.13.31       |
| 18   | Allocryptopine        | 1         | 100        | 2                  | ( <i>S</i> )-cis- <i>N</i> -methylcanadine | 0.32               | 1.14.13.239      |
| 24   | Laudanine             | 1         | 169        | 3                  | ( <i>S</i> )-reticuline                    | 1.00               | 2.1.1.291        |
| 31   | Codamine              | 1         | 98         | 2                  | ( <i>S</i> )-reticuline                    | 0.79               | 2.1.1.121        |
| 33   | Norreticuline         | 1         | 89         | 3                  | ( <i>S</i> )-reticuline                    | 0.09               | 1.5.3.10         |
| 37   | Corytuberine          | 1         | 154        | 1                  | ( <i>S</i> )-reticuline                    | 0.56               | 1.14.19.67       |
| 39   | Lambertine            | 1         | 75         | 6                  | ( <i>S</i> )-canadine                      | 0.45               | 1.3.1.29         |
| 43   | Armepavine            | 1         | 167        | 2                  | ( <i>S</i> )- <i>N</i> -methylcoclaurine   | 1.00               | 2.1.1.291        |
| 43   | 1,2-Dehydroreticuline | 1         | 93         | 1                  | ( <i>S</i> )-reticuline                    | 1.00               | 1.5.1.27         |
| 46   | Nandinine             | 1         | 139        | 1                  | ( <i>S</i> )-scoulerine                    | 1.00               | 1.14.19.73       |

**Supplementary Table 4. Top 5 BridgIT predictions for the biosynthesis reactions towards laudanine, armepavine, and nandinie.**

| BridgIT rank | BridgIT score | Predicted EC number | Corresponding enzyme |
|--------------|---------------|---------------------|----------------------|
| Laudanine    |               |                     |                      |
| 1            | 1.00          | 2.1.1.291           | CjColOMT             |
| 2            | 0.98          | 2.1.1.89            | Ps7OMT               |
| 3            | 0.77          | 2.1.1.118           | Ps7OMT               |
| 4            | 0.75          | 2.1.1.128           | PsHNC4'OMT           |
| 5            | 0.74          | 2.1.1.121           | Ps6OMT               |
| Armepavine   |               |                     |                      |
| 1            | 1.00          | 2.1.1.291           | CjColOMT             |
| 2            | 0.98          | 2.1.1.89            | Ps7OMT               |
| 3            | 0.78          | 2.1.1.118           | Ps7OMT               |
| 4            | 0.77          | 2.1.1.128           | PsHNC4'OMT           |
| 5            | 0.76          | 2.1.1.116           | Ps6OMT               |
| Nandinie     |               |                     |                      |
| 1            | 1.00          | 1.14.21.5           | AmCYP719A13          |
| 2            | 1.00          | 1.14.21.1           | EcCYP719A3           |
| 3            | 1.00          | 1.14.21.12          | EcCYP719A3           |
| 4            | 0.97          | 1.14.21.2           | EcCYP719A3           |
| 5            | 0.76          | 1.14.21.11          | ShCYP719A23          |

**Supplementary Table 5. Genes used in this work.**

| Gene ID            | Description                                                             | Source organism                  | Accession ID   |
|--------------------|-------------------------------------------------------------------------|----------------------------------|----------------|
| <i>AtCafOMT</i>    | Caffeoyl-coenzyme A <i>O</i> -methyltransferase                         | <i>Arabidopsis thaliana</i>      | NM_001342249.1 |
| <i>CjColOMT</i>    | Columbamine <i>O</i> -methyltransferase                                 | <i>Coptis japonica</i>           | AB073908.1     |
| <i>LjFlaOMT</i>    | 2,4',7'-trihydroxyisoflavanone <i>O</i> -methyltransferase              | <i>Lotus japonica</i>            | AK339587.1     |
| <i>SaPurOMT</i>    | <i>O</i> -demethylpuromycin <i>O</i> -methyltransferase                 | <i>Streptomyces alboniger</i>    | M74560.2       |
| <i>PsBBE</i>       | Berberine bridge enzyme                                                 | <i>Papaver somniferum</i>        | AF025430.1     |
| <i>PsS9OMT</i>     | Scoulerine 9- <i>O</i> -methyltransferase                               | <i>Papaver somniferum</i>        | JN185323.1     |
| <i>Ps6OMT</i>      | Norcoclaurine 6- <i>O</i> -methyltransferase                            | <i>Papaver somniferum</i>        | AY268894.1     |
| <i>PsCNMT</i>      | Cocclaurine <i>N</i> -methyltransferase                                 | <i>Papaver somniferum</i>        | AY217336.1     |
| <i>Ps4'OMT</i>     | 6-Methyl-( <i>S</i> )-laudanosoline 4'- <i>O</i> -methyltransferase     | <i>Papaver somniferum</i>        | MF038041.1     |
| <i>Cj4'OMT</i>     | 6-Methyl-( <i>S</i> )-laudanosoline 4'- <i>O</i> -methyltransferase     | <i>Coptis japonica</i>           | D29812.1       |
| <i>Ec4'OMT</i>     | 6-Methyl-( <i>S</i> )-laudanosoline 4'- <i>O</i> -methyltransferase     | <i>Eschscholzia californica</i>  | AB745041.1     |
| <i>Tf4'OMT</i>     | 6-Methyl-( <i>S</i> )-laudanosoline 4'- <i>O</i> -methyltransferase     | <i>Thalictrum flavum</i>         | AY610510.1     |
| <i>CjN6OMT</i>     | Norcoclaurine 6- <i>O</i> -methyltransferase                            | <i>Coptis japonica</i>           | D29811.1       |
| <i>Ps7OMT</i>      | ( <i>R,S</i> )-reticuline 7- <i>O</i> -methyltransferase                | <i>Papaver somniferum</i>        | AY268893.1     |
| <i>PsHNC4'OMT</i>  | 3'-Hydroxy- <i>N</i> -methylcocclaurine 4'- <i>O</i> -methyltransferase | <i>Papaver somniferum</i>        | AY217333.1     |
| <i>AmCYP719A13</i> | Stylophine synthase                                                     | <i>Argemone mexicana</i>         | EF451151.1     |
| <i>EcCYP719A3</i>  | Stylophine synthase                                                     | <i>Eschscholzia californica</i>  | AB126256.1     |
| <i>NnSCNS</i>      | Stylophine/canadine/nandinine synthase                                  | <i>Nelumbo nucifera</i>          | XM_010268782.1 |
| <i>PsCYP719A21</i> | Canadine synthase                                                       | <i>Papaver somniferum</i>        | JQ659003.1     |
| <i>ShCYP719A23</i> | Pluviatolide synthase                                                   | <i>Sinopodophyllum hexandrum</i> | KC110997.1     |

**Supplementary Table 6. Yeast strains used in this work.**

| Strain ID | Description                                            | Genotype                                                                                                                                           |
|-----------|--------------------------------------------------------|----------------------------------------------------------------------------------------------------------------------------------------------------|
| CSY1314   | <i>De novo</i> (S)-tetrahydrocolumbamine (THCB) strain | CSY1171 <sup>1</sup> ; <i>trp1</i> :: P <sub>PGK1</sub> - <i>PsBBE</i> -T <sub>PHO5</sub> , P <sub>TEF1</sub> - <i>yPsS9OMT</i> -T <sub>CYC1</sub> |
| CSY1315   | <i>De novo</i> THCB strain with <i>eCj4'OMT</i>        | CSY1314; <i>Ps4'OMT</i> :: <i>eCj4'OMT</i> <sup>‡</sup> ; Δ <i>yPs4'OMT</i> *                                                                      |
| CSY1316   | <i>De novo</i> THCB strain with <i>yCj4'OMT</i>        | CSY1314; <i>Ps4'OMT</i> :: <i>yCj4'OMT</i> ; Δ <i>yPs4'OMT</i> *                                                                                   |
| CSY1317   | <i>De novo</i> THCB strain with <i>eEc4'OMT</i>        | CSY1314; <i>Ps4'OMT</i> :: <i>eEc4'OMT</i> <sup>‡</sup> ; Δ <i>yPs4'OMT</i> *                                                                      |
| CSY1318   | <i>De novo</i> THCB strain with <i>yEc4'OMT</i>        | CSY1314; <i>Ps4'OMT</i> :: <i>yEc4'OMT</i> ; Δ <i>yPs4'OMT</i> *                                                                                   |
| CSY1319   | <i>De novo</i> THCB strain with <i>Tf4'OMT</i>         | CSY1314; <i>Ps4'OMT</i> :: <i>Tf4'OMT</i> ; Δ <i>yPs4'OMT</i> *                                                                                    |
| CSY1320   | <i>De novo</i> scoulerine strain                       | CSY1171 <sup>1</sup> ; <i>trp1</i> :: P <sub>PGK1</sub> - <i>PsBBE</i> -T <sub>PHO5</sub>                                                          |
| CSY1322   | <i>De novo</i> N-methylcoclaurine strain               | CSY1171 <sup>1</sup> ; Δ <i>PsCYP80B1</i> ; Δ <i>PsCPR</i> ; Δ <i>Ps4'OMT</i> *                                                                    |

\*CSY1171 contains two different isoforms of the *Ps4'OMT* gene – one that is wild-type, called here *Ps4'OMT*, and one that is codon-optimized for the yeast *S. cerevisiae*, called here *yPs4'OMT*

<sup>‡</sup> The prefix “e” here denotes that the gene is codon-optimized for expression in *E. coli*

**Supplementary Table 7. LC-MS/MS multiple reaction monitoring (MRM) transitions and parameters used in this work.**

| Compound                                 | Quantifier MRM transition (m/z <sup>+</sup> ) | Fragmentor voltage | Collision energy | Reference |
|------------------------------------------|-----------------------------------------------|--------------------|------------------|-----------|
| ( <i>S</i> )-tetrahydropalmatine         | 356.2 → 192                                   | 170                | 29               | This work |
| ( <i>S</i> )-tetrahydrocolumbamine       | 342 → 178                                     | 135                | 29               | 2         |
| ( <i>S</i> )-reticuline                  | 330 → 192                                     | 120                | 19               | 2         |
| ( <i>S</i> )-scoulerine                  | 328 → 151                                     | 135                | 30               | 2         |
| ( <i>S</i> )- <i>N</i> -methylcoclaurine | 300 → 107                                     | 100                | 37               | 5         |
| ( <i>S</i> )-armepavine                  | 314 → 107                                     | 100                | 35               | 6         |
| ( <i>S</i> )-laudanine                   | 344 → 137                                     | 120                | 35               | 7         |
| ( <i>S</i> )-nandinine                   | 326 → 176                                     | 135                | 30               | 8         |

  

| Compound                                 | Qualifier MRM transition (m/z <sup>+</sup> ) | Fragmentor voltage | Collision energy | Reference |
|------------------------------------------|----------------------------------------------|--------------------|------------------|-----------|
| ( <i>S</i> )-tetrahydropalmatine         | 356.2 → 176                                  | 170                | 61               | This work |
| ( <i>S</i> )-tetrahydrocolumbamine       | 342 → 163                                    | 135                | 29               | 2         |
| ( <i>S</i> )-reticuline                  | 330 → 137                                    | 120                | 31               | 2         |
| ( <i>S</i> )-scoulerine                  | 328 → 178                                    | 135                | 29               | 2         |
| ( <i>S</i> )- <i>N</i> -methylcoclaurine | 300 → 175                                    | 100                | 25               | 9         |
| ( <i>S</i> )-laudanine                   | 344 → 189                                    | 120                | 35               | 7         |
| ( <i>S</i> )-nandinine                   | 326 → 149                                    | 135                | 30               | This work |



**Supplementary Table 8 Exact *p*-values from Student's two-tailed t-tests in Figures 3 & 4.**

| Figure | Test                                           | <i>p</i> -value       |
|--------|------------------------------------------------|-----------------------|
| 3b     | PsS9OMT only vs. +CjColOMT                     | 0.0148                |
| 3c     | Without CjColOMT vs with CjColOMT for eCj4'OMT | $1.92 \times 10^{-4}$ |
| 3c     | Without CjColOMT vs with CjColOMT for yCj4'OMT | $3.52 \times 10^{-5}$ |
| 3c     | Without CjColOMT vs with CjColOMT for eEc4'OMT | $4.91 \times 10^{-4}$ |
| 3c     | Without CjColOMT vs with CjColOMT for yEc4'OMT | $2.46 \times 10^{-3}$ |
| 3c     | Without CjColOMT vs with CjColOMT for Tf4'OMT  | $2.49 \times 10^{-3}$ |
| 4b     | Empty vector vs. yCjColOMT                     | $2.45 \times 10^{-3}$ |
| 4b     | Empty vector vs. yCjN6OMT                      | 0.0362                |
| 4c     | Empty vector vs. yCjColOMT                     | $4.35 \times 10^{-3}$ |
| 4c     | Empty vector vs. yPsHNC4'OMT                   | $8.95 \times 10^{-3}$ |
| 4d     | Empty vector vs. yEcCYP719A3                   | $3.86 \times 10^{-3}$ |
| 4d     | Empty vector vs. yPsCYP719A21                  | 0.0467                |

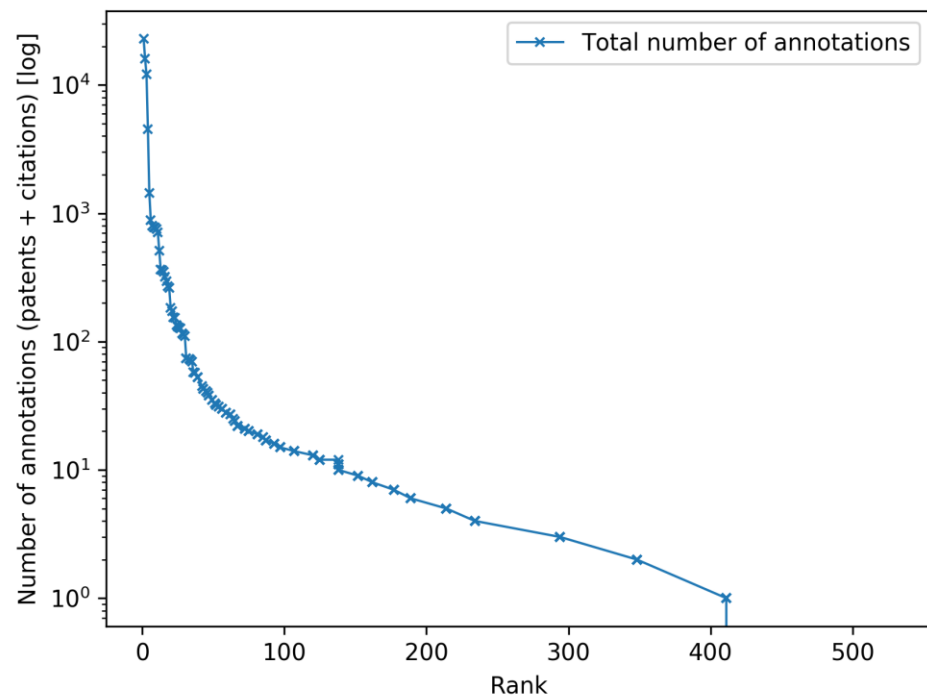

**Supplementary Figure 1. Distribution of the total number of annotations (patents + citations).** Compounds were ranked from highest number of annotations to lowest, and the number of annotations was plotted on a log scale. The corresponding data for this figure can be found in Supplementary Data 3.

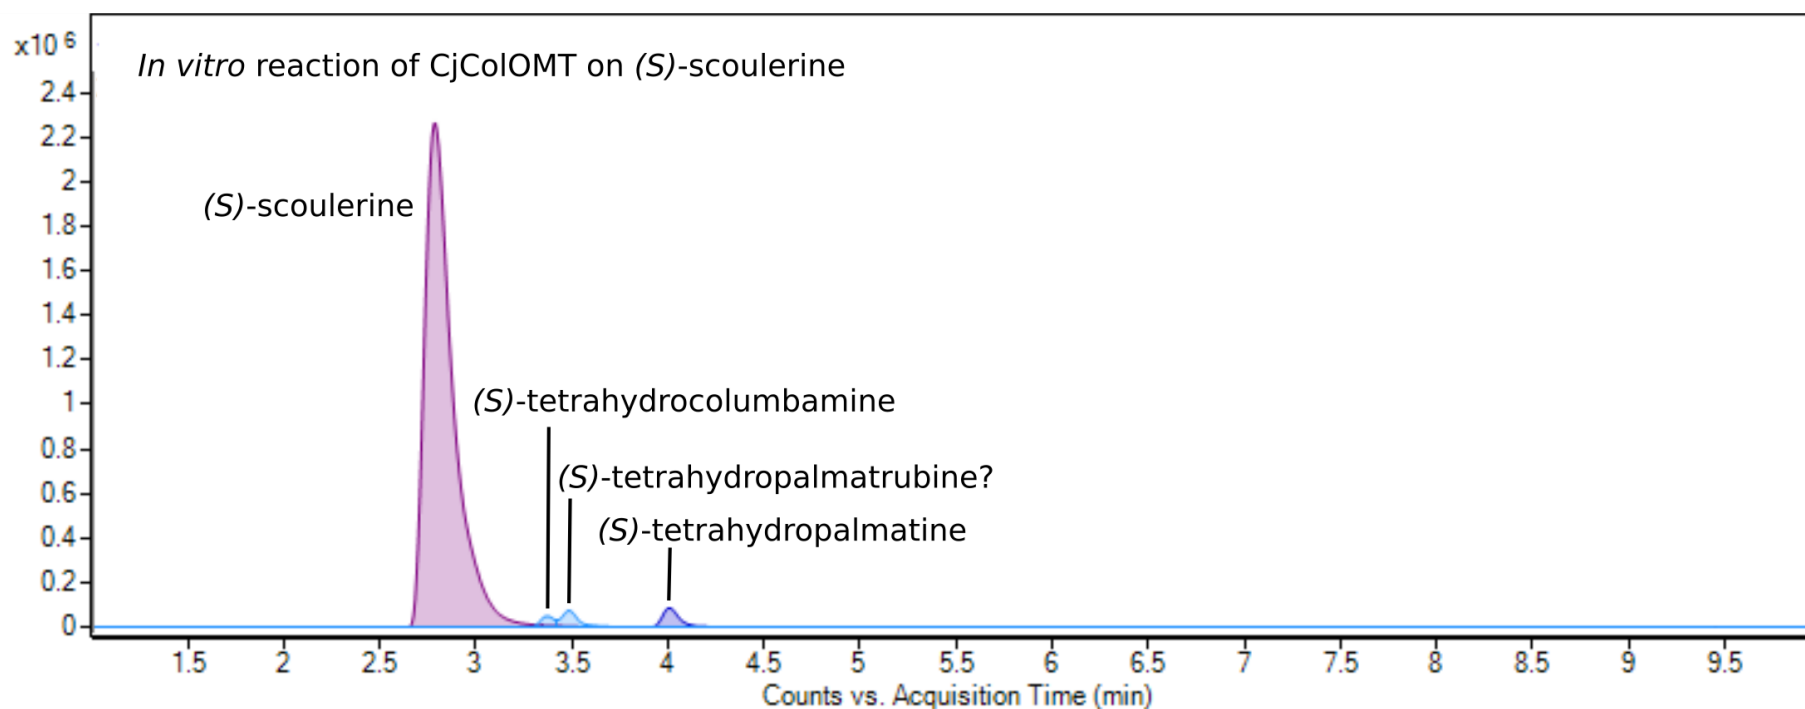

**Supplementary Figure 2. LC-MS/MS traces of *in vitro* reaction of CjColOMT on (S)-scoulerine.** The MRM transitions used for each compound are those described in Supplementary Table 7. The identities of (S)-scoulerine, (S)-tetrahydrocolumbamine, and (S)-tetrahydropalmatine were confirmed by coelution with authentic standards – an authentic standard for (S)-tetrahydropalmatrubine was not available, but its fragmentation pattern is consistent with that previously reported for (S)-tetrahydropalmatrubine<sup>1</sup>.

## Supplementary Reference

1. Valentic, T. R., Payne, J. T. & Smolke, C. D. Structure-guided engineering of a scoulerine 9-*O*-methyltransferase enables the biosynthesis of tetrahydropalmatrubine and tetrahydropalmatine in yeast. *ACS Catal.* **10**, **8**, 4497–4509 (2020).
2. Galanie, S. & Smolke, C. D. Optimization of yeast-based production of medicinal protoberberine alkaloids. *Microb. Cell Fact.* **14**, 144 (2015).
3. Ryan, O. W. *et al.* Selection of chromosomal DNA libraries using a multiplex CRISPR system. *Elife* **3**, 1–15 (2014).
4. Srinivasan, P. & Smolke, C. D. Engineering a microbial biosynthesis platform for de novo production of tropane alkaloids. *Nat. Commun.* **10**, (2019).
5. Kotake, Y. *et al.* Detection and determination of reticuline and N-methylcoculaurine in the Annonaceae family using liquid chromatography-tandem mass spectrometry. *Journal of Chromatography B* **806**, 75–78 (2004).
6. Zou, S. *et al.* Simultaneous determination of five alkaloids by HPLC-MS/MS combined with micro-SPE in rat plasma and its application to pharmacokinetics after oral administration of lotus leaf extract. *Front. Pharmacol.* **10**, 1252 (2019).
7. Desgagné-Penix, I. & Facchini, P. J. Systematic silencing of benzyloquinoline alkaloid biosynthetic genes reveals the major route to papaverine in opium poppy. *Plant J.* **72**, 331–344 (2012).
8. Díaz Chávez, M. L., Rolf, M., Gesell, A. & Kutchan, T. M. Characterization of two methylenedioxy bridge-forming cytochrome P450-dependent enzymes of alkaloid formation in the Mexican prickly poppy *Argemone mexicana*. *Arch. Biochem. Biophys.* **507**, 186–193 (2011).
9. Farrow, S. C., Hagel, J. M. & Facchini, P. J. Transcript and metabolite profiling in cell cultures of 18 plant species that produce benzyloquinoline alkaloids. *Phytochemistry* **77**, 79–88 (2012).
